# Supplementary material
Source: PubMed Central journal article supplement (PMC3651673)
Supplement: NIHMS425612-supplement-1.pdf [file NIHMS425612-supplement-1.pdf]

**Supplementary Information:**

**Controlled delivery of bioactive molecules into live cells using the bacterial mechanosensitive channel MscL**

Julia F. Doerner<sup>1,2</sup>, Sebastien Febvay<sup>1,3</sup> and David E. Clapham<sup>1,2</sup>

<sup>1</sup>Department of Cardiology, Boston Children's Hospital, Boston, MA, USA

<sup>2</sup>Department of Neurobiology, Harvard Medical School, Boston, MA, USA

<sup>3</sup>Harvard-MIT Division of Health Sciences and Technology, Massachusetts Institute of Technology, Cambridge, MA, USA

**Supplementary Figures S1-S5**

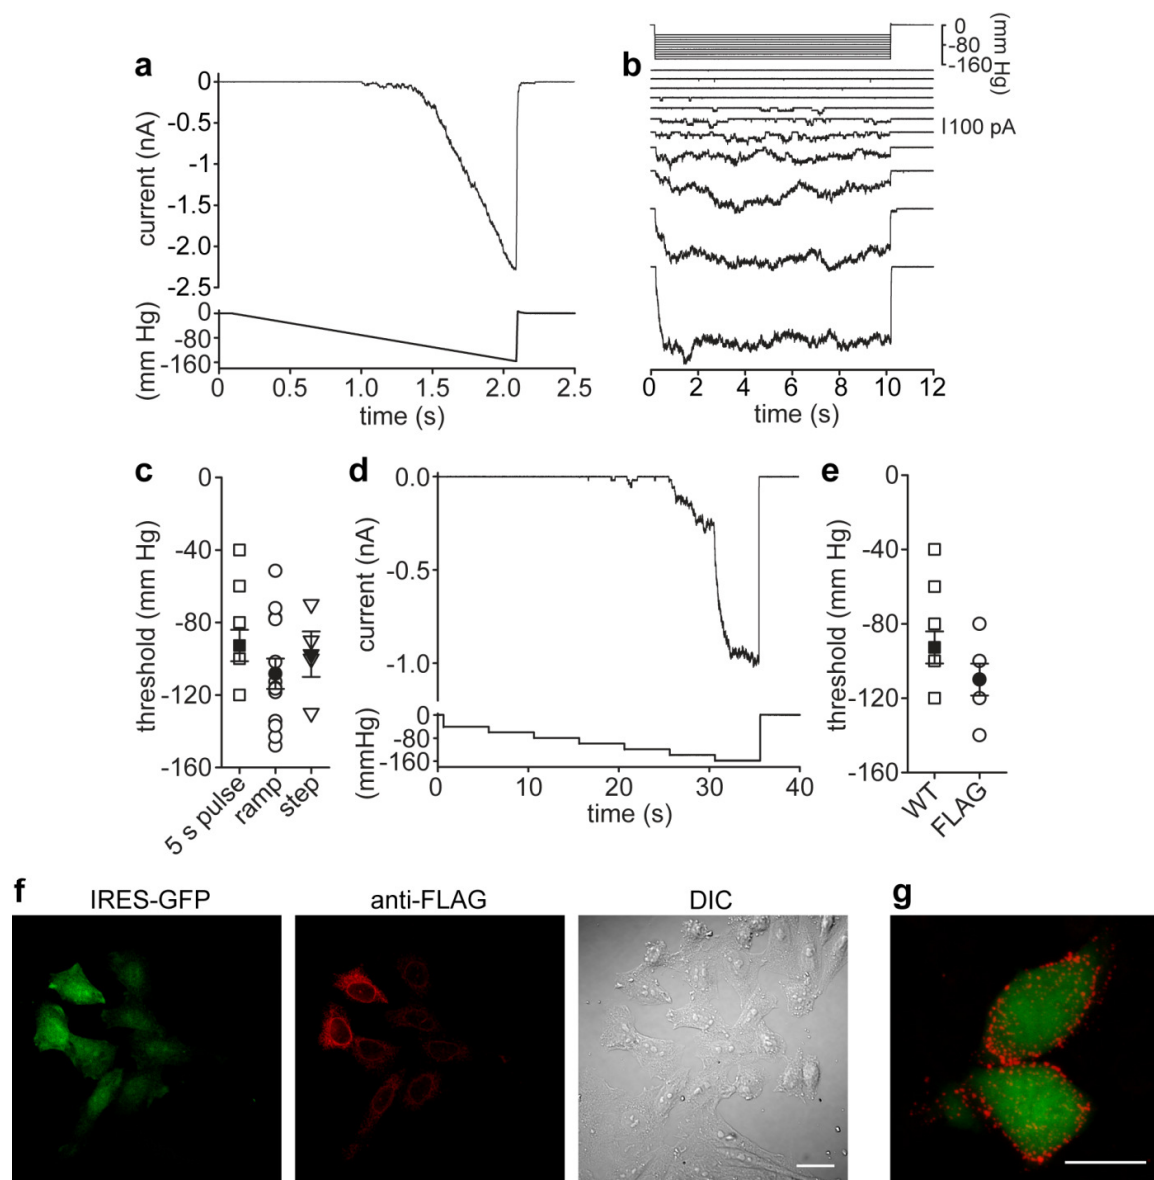

**Supplementary Figure S1. Functional expression of *E.coli* MscL in mammalian cell lines.**

(a, b) Representative currents recorded from inside-out patches of MscL expressing CHO cells in response to a 2 s pressure ramp (a) or successively (10 mm Hg) increasing pressure steps (10 s) (b) at  $V_m = -10$  mV. (c) MscL mean pressure threshold (filled symbols) in CHO cell membrane patches is consistent irrespective of the stimulation protocol (5 s pulse,  $-92.7 \pm 8.6$  mm Hg,  $n = 11$ ; ramp,  $-108.3 \pm 8.4$  mm Hg,  $n = 13$ ; step,  $-97.5 \pm 12.5$  mm Hg,  $n = 4$ ). (d) Representative current recorded from a membrane patch expressing FLAG-tagged MscL at  $V_m = -10$  mV. (e) MscL WT and FLAG-tagged channels display a comparable mean pressure threshold (filled symbols). Channels typically activate when the negative pressure exceeds  $-92.7 \pm 8.6$  mm Hg (WT,  $n = 11$ ) and  $-110 \pm 8.6$  mm Hg (MscL-FLAG,  $n = 6$ ), respectively. (f) Staining of fixed and permeabilized CHO cells expressing FLAG-tagged MscL in a bicistronic IRES-GFP vector. (g) MscL distribution on the cell surface. Average intensity z-projection of a stack of 14 confocal sections of anti-FLAG stained live CHO cells. Error bars in panel c and e represent SEM; note, several individual data points (open symbols) in c and e have the same value and thus are hidden; DIC, differential interference contrast. Scale bars, 20  $\mu$ m.

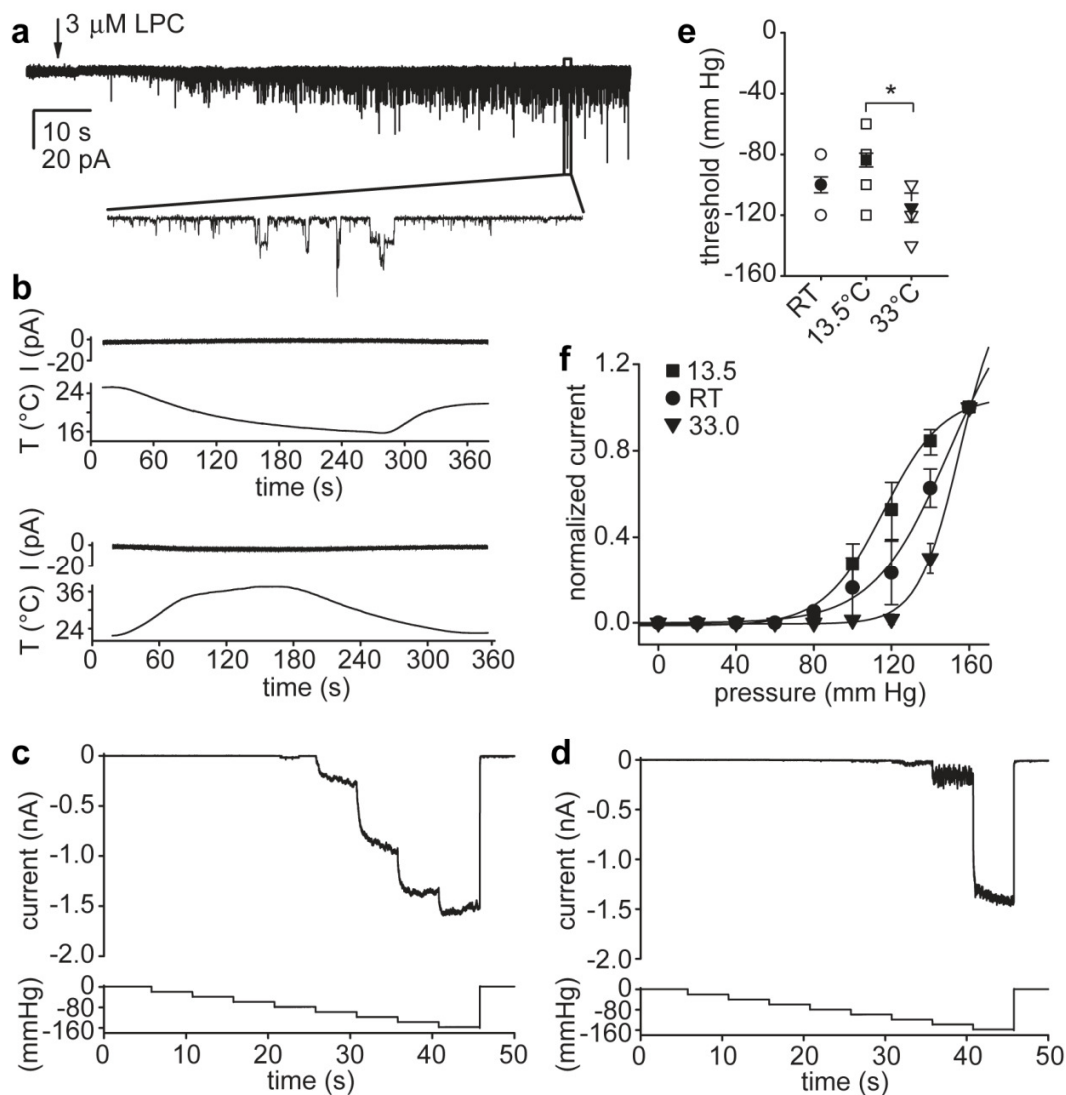

**Supplementary Figure S2. Changes in the transbilayer lateral pressure gradient or membrane fluidity affect MscL pressure sensitivity.** (a) Addition of 3  $\mu$ M LPC to the cytoplasmic side of a CHO cell membrane patch expressing MscL activates the channel in the absence of negative pressure ( $V_m = -10$  mV). The magnified inset illustrates MscL single channel openings. Mean calculated NPo after 1 min treatment with 3  $\mu$ M LPC was  $0.067 \pm 0.03$ ,  $n = 5$ . (b) MscL expressing inside-out patches (CHO cells) are unresponsive to cooling (upper panel, 25 to 16 $^{\circ}$ C) or heating (lower panel, 22 to 36  $^{\circ}$ C) of the bath solution ( $V_m = -10$  mV). (c, d) Representative currents (upper panel) recorded at 13.5  $^{\circ}$ C (c) or 33  $^{\circ}$ C (d) in response to 5 s pulses of gradually increasing negative pressure (lower panel) at  $V_m = -10$  mV. (e) Mean pressure threshold at the respective temperatures (13.5  $^{\circ}$ C,  $83.8 \pm 4.6$  mm Hg,  $n = 16$ ; RT,  $100 \pm 5.2$  mm Hg,  $n = 6$ ; 33  $^{\circ}$ C,  $115 \pm 9.6$  mm Hg,  $n = 4$ ; the shift in pressure thresholds at 13.5  $^{\circ}$ C and 33  $^{\circ}$ C is statistically significant,  $P = 0.007$ , Student's non-paired  $t$ -test). (f) Normalized current-pressure relation at different temperatures. Solid lines represent fits to a Boltzmann equation (13.5  $^{\circ}$ C,  $P_{0.5} = 115.9 \pm 2.9$ ,  $n = 7$ ; RT,  $P_{0.5} = 149.6 \pm 11.5$ ,  $n = 6$ ; 33  $^{\circ}$ C,  $P_{0.5} = 155.0 \pm 0.9$ ,  $n = 4$ ; significant difference in half maximal activation pressure from 13.5  $^{\circ}$ C to 33  $^{\circ}$ C,  $P = 0.019$ , Student's non-paired  $t$ -test). Error bars in e and f represent SEM.

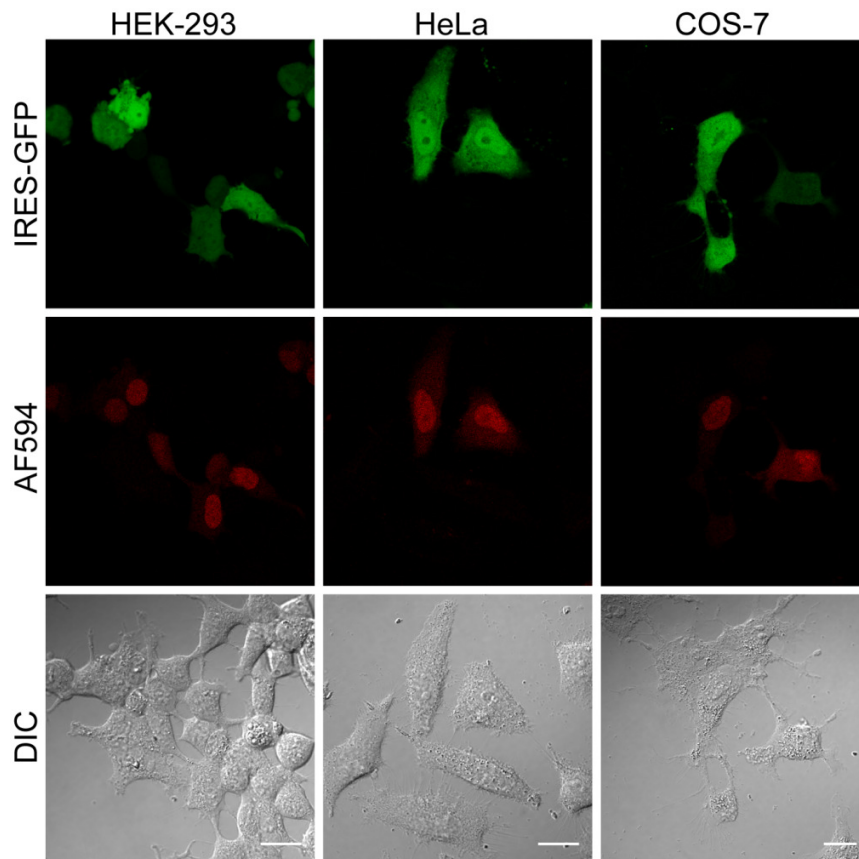

**Supplementary Figure S3. MscL G26C mediated delivery of Alexa Fluor 594 into HEK-293, HeLa and COS-7 cells.** Upper panel, transiently transfected MscL G26C being expressed from a bicistronic IRES-GFP vector; middle panel, Alexa Fluor 594 uptake (AF594); lower panel, differential interference contrast (DIC). HEK-293 cells were treated for 1 min with MTSET (1 mM) in the presence of 5  $\mu$ M Alexa Fluor 594 followed by 5 min exposure to DTT (1 mM) to mediate channel inactivation. HeLa and COS-7 cells were incubated with MTSET (1 mM) for 2 min in the presence of 5  $\mu$ M Alexa Fluor 594 and subsequently 10 min DTT (1 mM) to facilitate channel inactivation. Scale bars, 20  $\mu$ m.

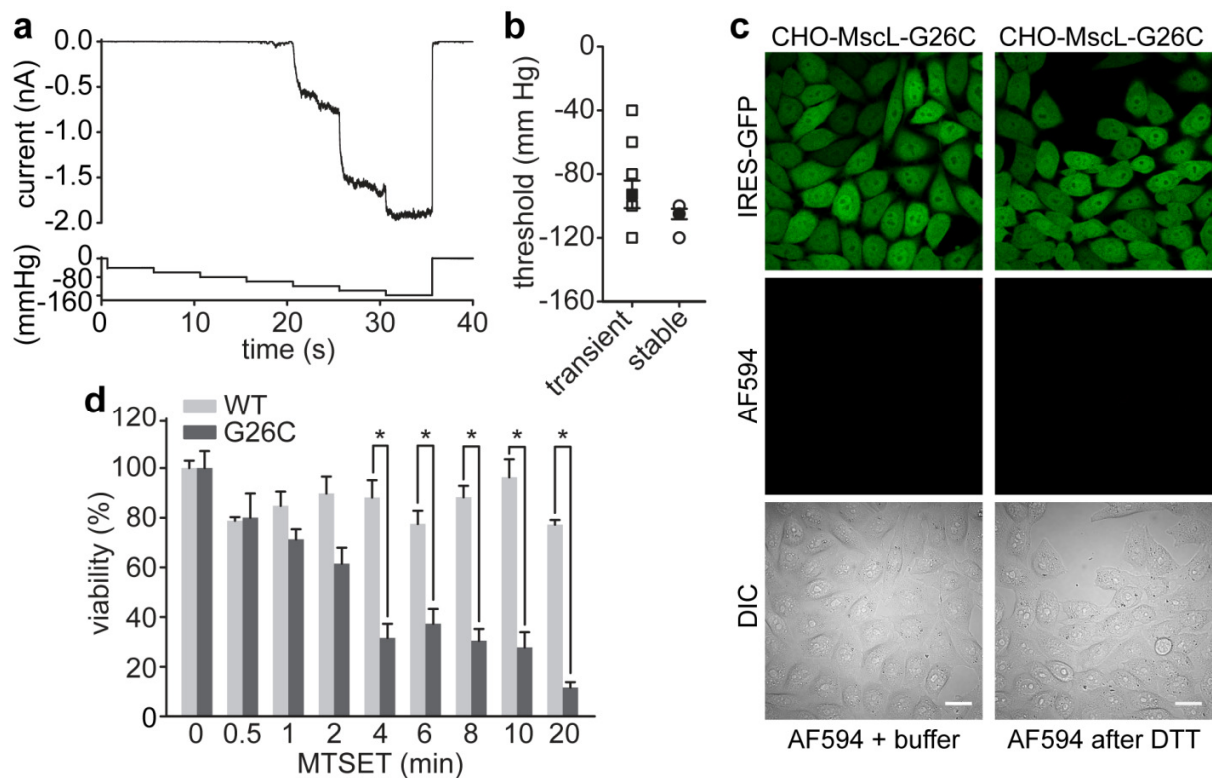

**Supplementary Figure S4. Characterization of CHO-MscL-WT and CHO-MscL-G26C cell lines.** (a) Representative current trace recorded from an excised inside-out patch of the polyclonal CHO-MscL-WT cell line in response to 5 s pulses of gradually increasing negative pressure (lower panel) at  $V_m = -10$  mV. (b) Mean pressure threshold for MscL WT comparing transient transfected CHO cells ( $n = 11$ ) with CHO-MscL-WT cells ( $n = 8$ ). (c) The monoclonal CHO-MscL-G26C cell line does not take up dye under control conditions: incubation with dye (Alexa Fluor 594, 10  $\mu$ M, 2 min) in K-aspartate based delivery solution with no added MTSET (left column); incubation with dye (Alexa Fluor 594, 10  $\mu$ M, 2 min) after DTT treatment (1 mM, 10 min) and channel inactivation (right column). AF594, Alexa Fluor 594; DIC, differential interference contrast. Scale bars, 20  $\mu$ m. (d) Cell-viability as a function of MscL activation time in Ringer solution. The monoclonal CHO-MscL-G26C cell line and the polyclonal CHO-MscL-WT cell line (serving as a control) were treated for the indicated time with MTSET (1 mM) followed by DTT exposure (1 mM, 10 min) to facilitate MscL inactivation. Viability was assessed using a MTT assay. Data were collected at 2 independent times in quadruplicate. Error bars represent SEM;  $P$  values  $< 0.05$  vs. WT control after 4 - 20 min MTSET treatment by Student's non-paired  $t$ -test.

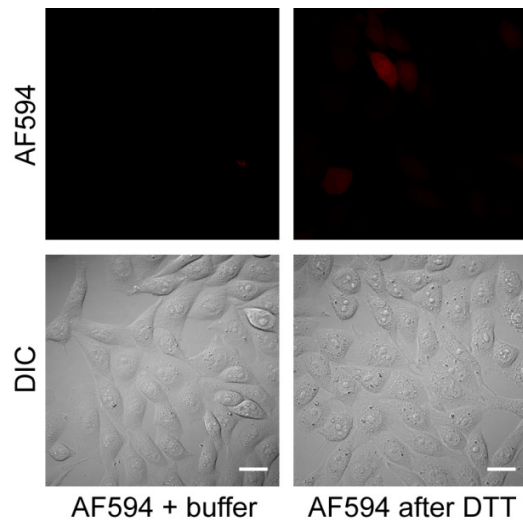

**Supplementary Figure S5. Weak uptake of model cargo under control conditions following extended MscL G26C activation by MTSET.** The monoclonal CHO-MscL-G26C cell line shows no, or only weak uptake of model cargo (Alexa Fluor 594) after extended MscL activation (8 min) under control conditions: incubation with the dye (Alexa Fluor 594, 20  $\mu$ M, 8 min) in K-aspartate based delivery solution with no added MTSET (left column), or after DTT treatment (1 mM, 10 min) and channel inactivation (right column). AF594, Alexa Fluor 594; DIC, differential interference contrast. Scale bars, 20  $\mu$ m.
